# Supplementary material
Source: Springer Nature journal article supplement (https://www.springermedizin.de/resource/supplementary/12998_2010_126_MOESM8_ESM.pdf/9623616)

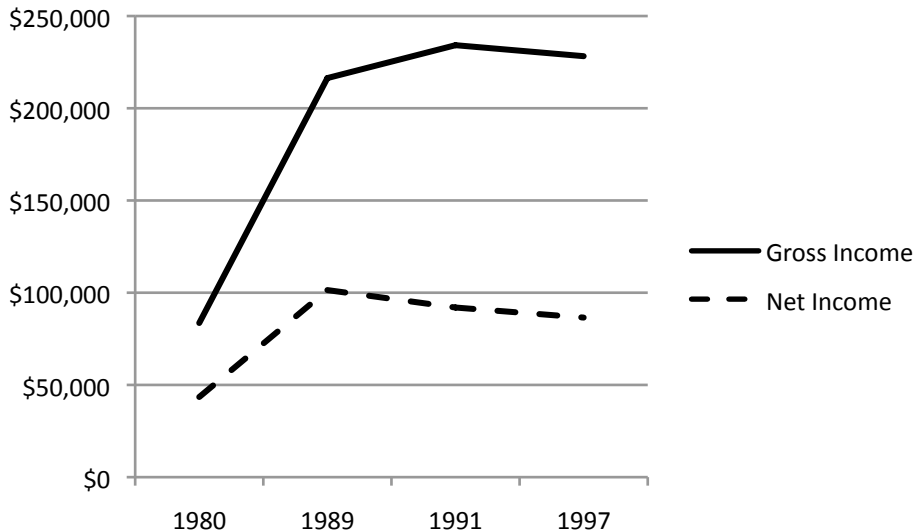

Supplement: MOESM8 [file 9623616]
